# Supplementary material for: Evaluation of MetriGenix custom 4D™ arrays applied for detection of breast cancer subtypes
Source: PubMed Central journal article supplement (PMC1421426; doi:10.1186/1471-2407-6-59), 2006-03-15
Supplement: 1471-2407-6-59-S1.pdf [file 1471-2407-6-59-S1.pdf]

## Supplementary table 1

### Genes immobilized on the MetriGenix breast cancer chip

The genes MGRN1 and TLE3 are immobilized twice to the chip with two different probes.

| Gene Symbol  | Accession Number          | Sequence                                            |
|--------------|---------------------------|-----------------------------------------------------|
| ACADSB       | <a href="#">NM_001609</a> | GCTGTAACCAGCATGTCAAATGTGAAGATTATTGTGTGGGATCCTTTGGT  |
| ACOX2        | <a href="#">NM_003500</a> | TGGAGATCCAAGCTATGAAATAACCAACAGTATTCAAGAAGCAACCAGCA  |
| ACTG2        | <a href="#">NM_001615</a> | TTCTCCAAGGATCCCCTCGAGACTACTCTGTTACCAGTCATGAAACATTA  |
| ADRA2A       | <a href="#">NM_000681</a> | CATCTGCATTTCTACATGTTTTAGACAGAGACAATTTAAGGCCTGCACTC  |
| ADRM1        | <a href="#">NM_007002</a> | AGAAAGAGGGCGACACGAAGGACAAGAAGGACGAAGAGGAGGACATGAGC  |
| AGTR1        | <a href="#">NM_031850</a> | TGCTGCACTGGTCCCAAGTAGTAGTGTCTCCTAGTATATTAGTTTGATT   |
| AKR1C3       | <a href="#">NM_003739</a> | CGACTTCAGTCAACTACAGCTGAGTCCATAGGCCAGAAAGACAATAAAT   |
| ALCAM        | <a href="#">NM_001627</a> | ATTGCTATCAGCAATGCCCAAACCTTTCTCATAAGCACCTAAAACCCAA   |
| ALDH1A2      | <a href="#">NM_003888</a> | AAGTGTTAGCTTCCTTTCTTCTTCCATCCCTTCTTCCATCTTTCCAGCT   |
| ANP32E       | <a href="#">NM_030920</a> | ACACTTAGAGCCTCCAGATAACTTTTAAGACTTATTTAGCTTTGTGGGTGG |
| ANXA1        | <a href="#">NM_000700</a> | AAGCTTCATCAAGCCATGAAAGGTGTTGGAACCTGCCATAAGGCATTGAT  |
| ANXA8        | <a href="#">NM_001630</a> | TGGGTACCTGGAGATTCTGAAGTGCCTTTGCTGTGGTTTTCAAATAA     |
| ANXA9        | <a href="#">NM_003568</a> | AGCACCACATTCTCTAGCTTCTTGTGAGGCTGGAACCTGTTTCTTTAA    |
| AOC3         | <a href="#">NM_003734</a> | AGGTCTGGATTGGGGATGGGGACAAAGAAATAGCAAGAGATGAGAAACAA  |
| APEG1        | <a href="#">NM_005876</a> | TTGACAAAGGCCTTACCAGGAAGGGTTAGGACACTGACCATTCTAGAAAT  |
| APM2         | <a href="#">NM_006829</a> | CCTCCCAAATTCGGAATCCAATCCAACGGTCTCAGGAATGTTTTCCAT    |
| APOD         | <a href="#">NM_001647</a> | CTGACTTCTAATAACATTGATGTCAAGAAAATGACGGTCACAGACCAGGT  |
| ARPC5        | <a href="#">NM_005717</a> | ATATCGAGTAGCTCTAAAACAAACCACCTGACCAAGAGGGGAAGTGAGCTT |
| ASAH1        | <a href="#">NM_004315</a> | TGTGCAAGACCGTTTGTCCACTTCATTTTGTATAATCACAGTTGTGTTCC  |
| ATP1A2       | <a href="#">NM_000702</a> | TACTTTTCAGGCACTTTAGAAATATCCTTTTAGAAGCAGCGAGTGCATGG  |
| ATP6V1G1     | <a href="#">NM_004888</a> | ATTCTTGCTAATGGTTAGAACAGTGAATACTAGTGAATTGTTTGGGCTGC  |
| B3GNT5       | <a href="#">NM_032047</a> | AAGGTTGCCATTGGTTGAAAACATAAGTGTCTCTGGCCATCAAAGTGATC  |
| BCL2         | <a href="#">NM_000633</a> | CCCTCCAAGGTAGAATTTGCAAGAGTGACAGTGGATTGCATTTCTTTTGG  |
| BECN1        | <a href="#">NM_003766</a> | ATACTGAATGCCGACTCTGCTCTGTGTTAGAGATATGAAATGGTGTTTGA  |
| BF           | <a href="#">NM_001710</a> | CCCTTGATAGTTCACAAGAGAAGTCGTTTCATTCAAGTTGGTGTAAATCAG |
| BLVRA        | <a href="#">NM_000712</a> | ACTTCCAAGATGGCACCAGCATTTGGTTCTTCTCAAGAGTTGACCATTAT  |
| BMP4         | <a href="#">NM_001202</a> | ACTCACCCACACACTACACAGACTGCTTCCTTATAGCTGGACTTTTATT   |
| BPHL         | <a href="#">NM_004332</a> | GTTGCTGCCTGTTAACATGATGCCTTTGAAACTCTCCGCCTTTGAAACTT  |
| BTG3         | <a href="#">NM_006806</a> | TAGAAGTGGACGATTTGTTCTAGCACCTTTGAGAATTTACTTTATGGAGCG |
| C10orf7      | <a href="#">NM_006023</a> | GCTCACAAGCTAATAGACTTCCTTAAGCTGAAGAGAAATCAGCAGGAGGA  |
| C14orf132    | <a href="#">NM_020215</a> | CCACGTGCCAGTCCTATTTCTGCCAGTTGAAGGCATACTAATATTCTTTA  |
| C4A          | <a href="#">NM_007293</a> | CTGGAGAAGCTGACCTCCCTCTCTGACCGTTACGTGAGTCACTTTGAGAC  |
| CACNA2D2     | <a href="#">NM_006030</a> | ATTAATGTCATGTTGCTTGTGCGCTTCTCAGTGTGTGTGTGTTGTTCCATG |
| CaMKIINalpha | <a href="#">NM_018584</a> | TTACTAGCTTGCTACCCACGATGAAATCAACAACCTGTATCTGGTATCAG  |
| CAPN6        | <a href="#">NM_014289</a> | GTCATTATGAAATGTACTTCCCTCCATCTTAACCTATCAACTTTCTGCC   |
| CAV1         | <a href="#">NM_001753</a> | CATGTCTGTTCTACATAGATGCTTAGTCCCTCATGCAATCAATTACTGG   |
| CBR1         | <a href="#">NM_001757</a> | AGCACTCACTAATGTACTACTAATTGAGCAACCTACGCACTCAGTTGACT  |
| CCNA2        | <a href="#">NM_001237</a> | AGACCTACCTCAAAGCACACAGCATGCACAACAGTCAATAAGAGAAAAG   |
| CCND1        | <a href="#">NM_053056</a> | TACCTGTAGGACTCTCATTCCGGGATGATTGGAATAGCTTCTGGAATTTGT |
| CCNE1        | <a href="#">NM_001238</a> | CCCTCTCCACATTATCAGTTGACAGTGTACAATGCCTTTGATGAACTGTT  |
| CCNE2        | <a href="#">NM_057749</a> | TCCATTGTGAGATAAGGACAGTGTCAAAGTGATAAAGCTTAACACTTGACC |
| CCR5         | <a href="#">NM_000579</a> | ACCCTCTGGGCCAAGTCAAAGACATTCTGACATCTTAGTATTTGCATATT  |
| CCR6         | <a href="#">NM_031409</a> | AGACTTTTGTATGAGGAGCTGCAGATTAGCTAGGGGACAGCTGGAATTA   |

| Gene Symbol  | Accession Number          | Sequence                                             |
|--------------|---------------------------|------------------------------------------------------|
| CCR7         | <a href="#">NM_001838</a> | GAGCAACATTTTACCCACACACAGATAAAGTTTTCCCTTGAGGAAACAAC   |
| CCR8         | <a href="#">NM_005201</a> | GATTGTTGTTATTAACAGCTGATACAGGTATTCTGCTGATGCTACTGCTG   |
| CD24         | <a href="#">NM_013230</a> | GCTACTGTGTGTGAATGAACACTCTTGCTTTATTCCAGAATGCTGTA      |
| CD36         | <a href="#">NM_000072</a> | AATAAACCTCCTTGGCCTGATAGAAATGATCTTACTCAGTGTTGGTGTGG   |
| CDC14A       | <a href="#">NM_003672</a> | AGTAATTCAGATGACATTTGAGAAGTAGGGGAAAGGGAATCATGTTGACAG  |
| CDC14B       | <a href="#">NM_033332</a> | TAATTTCTTGGTCTCCGAAAACCTCAGCTGTGACTGCTTTCCATTAACAGT  |
| CDC20        | <a href="#">NM_001255</a> | ATGGACGACATTTGGCCAGTGGTGGTAATGATAACTTGGTCAATGTGT     |
| CDH1         | <a href="#">NM_004360</a> | TTCTGTGTAGAGAATGTCACTGTAGTTTTGAGTGTATACATGTGTGGGTG   |
| CDH3         | <a href="#">NM_001793</a> | TATTTTCCCTGTTGCGTTGCTATAGATGAAGGGTGAGGACAATCGTGTAT   |
| CDK2AP1      | <a href="#">NM_004642</a> | TACTTAGTAGCCGGTCCCATTTGCCATACAATGTAGTTCTGCTTAATG     |
| CEACAM6      | <a href="#">NM_002483</a> | CATCAGGAGAACATCATAACCCATGAAGGATAAAAGCCCCAAATGGTGGT   |
| CES1         | <a href="#">NM_001266</a> | GAGGCCATGAAGGAGCAAGTTTTGTATTTGTGACCTCAGCTTTGGGAATA   |
| CHI3L2       | <a href="#">NM_004000</a> | ACCTGGTTTTGTTTTCTGCAGCTGTTGACTTGTGGCCCTGAAGTACAAT    |
| CHIT1        | <a href="#">NM_003465</a> | GTGGGCTTTGATGATGTGGAGAGCTTCAAACCAAGGTCAGCTATCTGAA    |
| COX6C        | <a href="#">NM_004374</a> | GATTTTGAGGAGATGAGGAAGGCTGGTATCTTTAGAGTGTAAAGTAATC    |
| CP           | <a href="#">NM_000096</a> | TGCTATTAATGGAAGAATGTTTGAAACCTACAAGGCTCACAAATGCACG    |
| CRABP1       | <a href="#">NM_004378</a> | TTCCCTACCAATATTAGGTGATCCCGTTTTCCCATGACAATGTTGTAG     |
| CRAT         | <a href="#">NM_000755</a> | TGTGAGGTTTACCTCCGTTGCGGCTGTGCTCCTGTGGATAACATTGCTA    |
| CRBPIV       | <a href="#">NM_052960</a> | TTATATTGCAGACTGAACAGACGTTTATCTATCCCATTTGGCGACGAGGA   |
| CRYAB        | <a href="#">NM_001885</a> | GAAAGTTTCCCCACCAGTGAATGAAAGTCTTGTGACTAGTGCTGAAGCTTA  |
| CSDA         | <a href="#">NM_003651</a> | CCTTCACCATCGGCAGGTGACCTAAGAATTAATGACCATTGAGAAATAA    |
| CTPS         | <a href="#">NM_001905</a> | CCAGGATGGTGTTACTGCAGTTGAAGGGCAATATGAAGTTACTTTCTTAA   |
| CX3CL1       | <a href="#">NM_002996</a> | GAAAGACTTTTCCAACCCTCATCACCACGCTGTGCCATTTTGTATT       |
| CX3CR1       | <a href="#">NM_001337</a> | CATCCAATCTAACCACATCAATATTGTCATTCTGTATTCACCCGTCCAG    |
| CXCL1        | <a href="#">NM_001511</a> | CTTGTAAGGCATACTGCCTTGTTAATGGTAGTTTTACAGTGTCTTCTGGC   |
| CXCR4        | <a href="#">NM_003467</a> | GTTTTCAGGAGTGGGTTGATTTGAGCACCTACAGTGTACAGTCTTGTATT   |
| CYB5         | <a href="#">NM_001914</a> | TGCTTTGGACACGGGAGAAAAGAAGCCATTGCTAACTACTTCAACTGACA   |
| CYB561       | <a href="#">AK095244</a>  | TTATTTTGCCTGTGGCCAATCTTCTGTGAAATACAATGTGCTGTTGGTGC   |
| CYP2A6       | <a href="#">NM_000762</a> | GCTGGGATGAGAGGAAGGAAACCCTTACATTATGCTATGAAGAGTAGTAA   |
| DIP13B       | <a href="#">NM_018171</a> | TGCGCGATACAGGTCTAGTTTTCGGTAAGTGTCCAGACATCAAGCAATAA   |
| DKFZP761F241 | <a href="#">NM_031455</a> | ATTCTCCATAGTATGGTGAATAGCAGGTGCGTCTTCTAGTTTATTCCCTC   |
| DP1          | <a href="#">NM_005669</a> | TTCTTCAAGAAAGAATTCCCTGCAGCAGTTATTCCCTTACCTGAAGGCTTC  |
| E2F1         | <a href="#">NM_005225</a> | GCACTTTGATTTGCTTCCCTAACAGCTCTGTTCCCTCCTGCTTTGGTTTTA  |
| EBF          | <a href="#">BC038805</a>  | ATCTGCAAGTGCAGGGTGTGGTTAAAGTTGTACCTCCCAAGTATTTG      |
| EBNA1BP2     | <a href="#">NM_006824</a> | GCAAGAAAGGGTCAAATAAGAGACCTGGAAAACGAACAAGAGAGAAGATG   |
| EDN1         | <a href="#">NM_001955</a> | CTGGCACATTTGAGGGAGAACTCCAAAGTCCACACAAAGATTTTCTAAG    |
| EIIs1        | <a href="#">NM_152793</a> | GTTGCCCTTCGTTAGATGCTTCAAACAGTGTAAATCCTATACTGCACCCT   |
| ENPP2        | <a href="#">NM_006209</a> | CAGCTACCCAGAAATCCTGACACTCAAGACATACCTGCATACATATGAGA   |
| ENPP5        | <a href="#">NM_021572</a> | TGAATAGAAGCAACCAGGCACCATCTCAGCAATGTTTTCTTTGTTTGT     |
| EPAC         | <a href="#">NM_006105</a> | TTCATGCCCTTCTTCTCAAAGACATGACCTTCATTTCATGAGGGAAACCA   |
| ERBB2        | <a href="#">NM_004448</a> | CAGCAATGGTGTGAGTATCCAGGCTTTGTACAGAGTGTCTTTCTGTTTAG   |
| ESR1         | <a href="#">NM_000125</a> | GGGATGCTCGAGCACCTGTAAACAATTTTCTCAACCTATTTGATGTTCAAT  |
| ESR2         | <a href="#">NM_001437</a> | ATGAGGGGAAATGCGTAGAAGGAATTCTGGAAATCTTTGACATGCTCCTG   |
| EST          | <a href="#">AL080130</a>  | TCTCAAGACCAGCTACTTCTGGACAATGGAATACTTTTTCAGTCTGGTATG  |
| EST          | <a href="#">AK021858</a>  | GCTTGCAGTTTGTGGAGATAATACAGTTTCTGCTATCTGCCGCT         |
| EST          | <a href="#">AK092335</a>  | CATTCAGAAGTATGGCCAACGGATTTATCTTAAAACCAATGGAGGAAGAAG  |
| EST          | <a href="#">AK097484</a>  | CCATTTTAGTCTTCATAGCTATTGGCTAAGAGAGATAATGAGCTGATGGTCT |

| Gene Symbol | Accession Number          | Sequence                                             |
|-------------|---------------------------|------------------------------------------------------|
| EST         | <a href="#">AK055474</a>  | ACTGCTTAACCTAGGCTATGTGAACCCACAGTAAACCTGAAGGTGTTTGA   |
| EST         | <a href="#">BC027989</a>  | ATCCTTTGGAAACTGGATGTCTTACTGGGTGCTAGAATGAAAATGTAGGT   |
| EST         | <a href="#">AK094603</a>  | GAAACATCGTTGAGTAGCCTACCTTGATTTCTGTCAAGTTCATAACCAGC   |
| EST         | <a href="#">NM_016613</a> | GTAGATGTGTTTTCAGAGCTAGGTACAGAGGAATGTTTGCTACCTTTAG    |
| EST         | <a href="#">AK098220</a>  | GGTAGGTGTCTCCAGCACTGTATAGGTGTCTGGAATTGAGATAAGAATCA   |
| EST         | <a href="#">AI738443</a>  | TGGGCTGTTTGACAACCCCATTTTCACCAAGTCAAACATGGCTTTACCT    |
| EST         | <a href="#">AL572847</a>  | AGTGCGAAATCCCTTAAACTCATATCAGACCTGTGATGAACAAACTCATACT |
| EST         | <a href="#">AK096401</a>  | ATAATACAGAGGATAAATGTTGAGGTGACTGAGACCCCATTTACCCTATG   |
| EST         | <a href="#">BQ723065</a>  | TATCTATCCCCTCATGTCTTTGTTCTCTATCCCTCGTACACGTTTCTCTAT  |
| EST         | <a href="#">BU633431</a>  | TCTACCTCTAAGGAGATTAAGGAGTGTAACACAAAGGTGAGGTTGGAGT    |
| F2          | <a href="#">NM_000506</a> | TTCTACACACATGTGTTCCGCCTGAAGAAGTGATACAGAAGGTCATTGA    |
| F3          | <a href="#">NM_001993</a> | GCAGCTTCCTAATATGCTTTACAATCTGCACTTTAACTGACTTAAGTGGC   |
| FABP4       | <a href="#">NM_001442</a> | GAATTTGACGAAGTCACTGCAGATGACAGGAAAGTCAAGAGCACCATAAC   |
| FABP7       | <a href="#">NM_001446</a> | CTTACTTTTGGTGATGTGGTTGCTGTTTCGCCACTATGAGAAGGCATAA    |
| FACL2       | <a href="#">NM_021122</a> | CAGGGCTTGCACTAAAGAATTGTCATTGTAATAACACTACTTGGTAGCCT   |
| FADS2       | <a href="#">NM_004265</a> | AGGCAGAATGAACCCATAGGGAGCTGATCGTAATGTTTATCATGTTACTT   |
| FBP1        | <a href="#">NM_000507</a> | TCAAATGCTGTAGAATGCTTGGCACTCCCTAACCAATGCTGTCTCCATA    |
| FLJ10511    | <a href="#">NM_018120</a> | TACCATCATCAGTGAGAGTCTTGAGTTCACTAACATTGTCACCTTCTGGA   |
| FLJ10697    | <a href="#">NM_018181</a> | TTCTCTTTCAATGTACCTTCCTTCACCTCGTCGTATATATCCTCGATAAG   |
| FLJ10948    | <a href="#">NM_018281</a> | TGGCTAGAAATAATCACGAGGGTTGGGTTTGCTTTGGAAAATGCCTGTCT   |
| FLJ10980    | <a href="#">BC040548</a>  | CAGATCATCATGCCATTCATAGCCAGGATTCCTTATCCCCAAAACAGTT    |
| FLJ13322    | <a href="#">NM_024722</a> | CACACACTCGGGACGTCTTCATTGAAGATTCACTTACAAAGGAATGTTTC   |
| FLJ14525    | <a href="#">NM_032800</a> | ACACACTTTTTCAGGAGAAACCTGAGCATGATTTTGGATTCTCCACCTC    |
| FLJ25604    | <a href="#">NM_152663</a> | GAAAGGAAAACCAACATGAAACACCAAATAGTGTGTGTAATCTTCTGGC    |
| FLJ32389    | <a href="#">NM_144617</a> | CTACTTCCTTCTGAGTCCTCTACAAAGACATCCGGGTACTACATTTCCAT   |
| FLT1        | <a href="#">NM_002019</a> | TTGGATCGCTAAGCTGGCTCTGTTTGATGCTATTTATGCAAGTTAGGGTC   |
| FMO2        | <a href="#">NM_001460</a> | AATGGGAAGGAGCCAGAAATGCCATCTTCACCCAGAAACAAAGAATACTG   |
| FMO5        | <a href="#">NM_001461</a> | GGGAGCTCAGGTACTCTTTTAGTCATCTTTGTATGTCTTTAGCAGAGTTC   |
| FMOD        | <a href="#">NM_002023</a> | AATCCACAAAAGCCAAACCAGCTCATTTCACAAAGGAGCTCCGATGTGA    |
| FOXA1       | <a href="#">NM_004496</a> | TTGGAGGAGAGATAAGTTATAGGGAGCTGGATTTCAAACGTGGTCCAAG    |
| FTHFD       | <a href="#">NM_012190</a> | GGGTCAAGACAGTGACCTTCGAATACTGAAGAAAGGTCTTTGTGAGAAGA   |
| FVT1        | <a href="#">NM_002035</a> | TCGGAGCATATATGTAGCTTTTAGGAAAGGCTGATGATGGTATAAAGTTTGC |
| FXYD3       | <a href="#">NM_021910</a> | AGCCATGGGACCTCATATGCAATTTGGGATTTACTAGTAGCCAAAAGGAA   |
| FZD7        | <a href="#">NM_003507</a> | ATAGAACTCGGATTCCTTTGCATGATGGGGTAAAGCTTAGCAGAGAATCA   |
| GABRP       | <a href="#">NM_014211</a> | GGAGTGCTGGTGAAAAGAGATGAAATGTGGTTGTATGAGCCAATCATAT    |
| GALNT10     | <a href="#">NM_017540</a> | TAGCTTTAGAAGTGCCCTCTATAGAAAGAAGTCAAAGATGAGGCCCC      |
| GATA3       | <a href="#">NM_002051</a> | TAGGCGAATCATTGTTCAAAGCTGTTGGCCCTCTGCAAAGGAAATACCA    |
| GGH         | <a href="#">NM_003878</a> | CTTGCTACTCATGGCAAGATTAGGAAGTCACAGATTCTTTTCTATAATGTGC |
| GLDC        | <a href="#">NM_000170</a> | GCAAGTTTGCAGATGTCATAGAGGCTATCCTGGAGACTTAATAGACATT    |
| GNG11       | <a href="#">NM_004126</a> | AGGGTTATGTATAAAAGCATATGTGCTACTCATCTTTGCTCACTATGCAGTC |
| GPCR1       | <a href="#">NM_014373</a> | GTCAACTGGAAGTGCTGCTTCATTCCACTTACAATTCCTAATCTTGAGCA   |
| GPD1        | <a href="#">NM_005276</a> | TGTGACTCAGGCCTTCCCATCAGGCCTATTTGTCTACCCAATAAAGCGTG   |
| GPX3        | <a href="#">NM_002084</a> | GGACAGTGACAACCCTTTCTCTCCAGTTCCTCACTCCAATGATAATAGTT   |
| GRB7        | <a href="#">NM_005310</a> | CTTTGTACAGACCGAGAGGCCAGTTGATCTGCTCTGTTTTATACTAGTGA   |
| GRLF1       | <a href="#">NM_024342</a> | GAATTCCTGGCTTGTGTGCATACTGGGTGTCACGGCACACATTTACTCT    |
| GSTM3       | <a href="#">NM_000849</a> | AGGATATGTGGAGAATCATCAAGATATGAATTGAATCGCTGCGATACTGG   |
| GSTP1       | <a href="#">NM_000852</a> | GAGTACGTGAACCTCCCCATCAATGGCAACGGGAAACAGTGAGGGTTG     |

| Gene Symbol   | Accession Number          | Sequence                                              |
|---------------|---------------------------|-------------------------------------------------------|
| HIS1          | <a href="#">NM_006460</a> | CACAAATCAATAAATCAAGGGAGATTATACCAGTAGGACTGAATCAGGGC    |
| HMGCS2        | <a href="#">NM_005518</a> | TCAGCTGTTGCCTTCAAGATCCAGATAAACTTTCTGTGCATGTGTTAGAA    |
| HOXB5         | <a href="#">NM_002147</a> | GTCTCAGTGATTTCGCTTTTGGTATTTGTTTGTAGCTTTCCTGGAAGTCAAAT |
| HOXB6         | <a href="#">NM_156036</a> | TGTCTTAGCTCTGGACGTGAAATACTTCGATGATGATGATGATGATGATG    |
| HRASLS3       | <a href="#">NM_007069</a> | GTCTTGTGTTTGTAGAGAGTTTGGGGTTTGGTTTGTGGATTTTCATTGTGA   |
| HSD17B4       | <a href="#">NM_000414</a> | CTGCTGATACAACAATCATACTTTCAGATGAAGATTTTCATGGAGGTGGTC   |
| HSPC163       | <a href="#">NM_014184</a> | TGAAGTCACACATGAAAGAAGCCATGATCAAGCTTGTTTCCACTTGCTC     |
| ID4           | <a href="#">NM_001546</a> | CTATAGCTATGTTACGCTAAGCTACTGTCCCATCTCTTGTGATGTGTAAC    |
| IGFBP2        | <a href="#">NM_000597</a> | GCACATCCCCAACTGTGACAAGCATGGCCTGTACAACCTCAAACAGTGCA    |
| IGJ           | <a href="#">NM_144646</a> | CCAATTATCATGCTCACCTGAAAGAGGTATGCTCTCTTAGGAATACAGTT    |
| IL8RB         | <a href="#">NM_001557</a> | TTCTGCAGATAAACAGTAGTGATAGTTGTACCGCAATGTGACTTAATGCC    |
| IMP-1         | <a href="#">NM_006546</a> | GTAGATCAGGTTTGCCCACTTGATTGAGAAAGATGTTCCAGTGAGGAA      |
| INPP4B        | <a href="#">NM_003866</a> | TGGATTGCATGAGAAGAGAAGGATGCCGCATAGAGAATGTACTGAAGAAT    |
| ITGA7         | <a href="#">NM_002206</a> | GACCTTAGTTTTGCTGCCATCAGTCTAGTGGTTTCGTGGTTTCGTCTATTTA  |
| ITM2C         | <a href="#">NM_030926</a> | AACTGTTTTGAAAGATAACACAGAGGGAAAGGGAGAGCCACCTGGTACTT    |
| KCNK1         | <a href="#">NM_002245</a> | TTCTGTACATATGGTTTAGGTCACCAGATCCTAGTGTAGTTCTGAAACTAAG  |
| KIAA0182      | <a href="#">XM_050495</a> | ACATGTTTCACACAAGTGTAGAAAATGCCAGGGATCCACCACAAGATGGA    |
| KIAA0239      | <a href="#">NM_015288</a> | TAGAGAGAGTTTTGAATTCTACACTGTTGTCTTTCCTCTGTGCTGGCCTA    |
| KIAA0303      | <a href="#">AB002301</a>  | GGGCGACTGTGTCTTGACTACCTTTCAAAACCAGCACTGTGTGGGAATGT    |
| KIAA0876      | <a href="#">AB020683</a>  | AGGAAAACAGAGAGAGTGTACGCAGGAGCAAGCCTTTCATTTCTTGGT      |
| KIAA1025      | <a href="#">XM_034056</a> | GGGAAAAGGGTGGGATTGTCCAGCATGCTTGTATGTATATTTCAGAACCT    |
| KIAA1691      | <a href="#">AB051478</a>  | TCTCGTCAATGTAATTTCTGTGGTTTCTATTCAGCTTGGGTTTCATGTT     |
| KIF23 (KNSL5) | <a href="#">NM_138555</a> | ACTGACCCAGAGCAAAGCTTTCCTATGGTTCCAAAGACAAGTAGTATTC     |
| KIP2          | <a href="#">NM_006383</a> | TGGTGTGCTGTCCACAGATTTGTGAACTCCTGGTAGTAAACACTTTTGC     |
| KIT           | <a href="#">NM_000222</a> | TGTTGGTGTTCACGTGTTTTATTCTGTATGTTGTCCAATTGTTGACAG      |
| KRT17         | <a href="#">NM_000422</a> | TGCTTCAGTCCCTTCCCATGCTTCTTGCCTGATGACAATAAGCTTGT       |
| KRT5          | <a href="#">NM_000424</a> | CAGTTCTATATTCTGCTTCAAATCAGCCTTCAGGTTTCCCACAGCATG      |
| LAD1          | <a href="#">NM_005558</a> | ACTCATTTACTCTCAGGTGTAAGAGACTGATGAGACCTTAGAAGCGAATT    |
| LAF4          | <a href="#">NM_002285</a> | GGATGTTTCGACTCAAAGGGACCACGCTGTAAGTATTCAAAAGCACTA      |
| LAMC2         | <a href="#">NM_005562</a> | GACTATGGTGTGCTGCCTTGCTTCTGTATTTCTTGGATTTTCTGAAAGTG    |
| LAPTM4B       | <a href="#">NM_018407</a> | TGCAAGCTACATCCTACTGCTTTGAACTTCCAAGTATGTCTAGTCACCTT    |
| LIV-1         | <a href="#">NM_012319</a> | ACTAACACAGTTATTCCTATACTGGATTTTAGGTCTCTGAAGAACTGCTGG   |
| LOC157378     | <a href="#">BC041379</a>  | GGGTAAAGTGTAAAGTGCTTTCTTTTGTCCCTAACTTGTGTATTGATGGCA   |
| LOC255743     | <a href="#">XM_171089</a> | CACCTCATCAGTATGATTCAGTTTCTCTTATCAATTGGACTCTCCAGGT     |
| LOC283445     | <a href="#">XM_211044</a> | TTGGTTTTGGAGAGAAAGACAAGTTATGAGTAGCTGCTACCCTGGAAC      |
| LOC284665     | <a href="#">XM_211581</a> | CCCTGGGTTGAATCAAGATAGTACTTGCAGCTAGATGGATGCTTTTAG      |
| LPL           | <a href="#">NM_000237</a> | TGTGGTGCTAACTGTATGTGTCTTTATCAGTGTGGTCTCACAGAGCCAA     |
| LRBA          | <a href="#">NM_006726</a> | TCTTTTAAAGTAAATGCAAGTACCAAAGCTCACTACTGCGGTTTGCCTGT    |
| LU            | <a href="#">NM_005581</a> | GGCGATGGCCCATGCTGTGCTCAGTTCTATCACCTTCGATTCCAATGG      |
| MAP3K8        | <a href="#">NM_005204</a> | AACTGATGAATTAGAAGCCATCTGACAGCAGGCCACTAGTGACAGTTTCT    |
| MCCC2         | <a href="#">NM_022132</a> | TTAGAGAAATTTCTCTGTGGCTCAGTTTTACCACCATAAAGCGGAGACA     |
| MCM3          | <a href="#">NM_002388</a> | TCCGCCCTACTTCCCATCCCACACAAACCAATTGTAATAACATATGAC      |
| MDS029        | <a href="#">NM_018464</a> | CACCTTCGCTGGATTCTAAATGTGGTATATTGCAAACCTGCAGCTTTCACA   |
| MFGE8         | <a href="#">NM_005928</a> | TTCTTAGGCACTGAGGGATCTGAGTAGGTCTGGGATGGACAGGAAAGGG     |
| MGC10500      | <a href="#">NM_031477</a> | AGCCAGAAGTACAAAGAGGGGAAGTACATCATTGAACTCAACCACATGA     |
| MGC27171      | <a href="#">NM_144591</a> | GGGACTCTATATTGTTGTAGTTCAGGTCTTCATTGACTAAGAGATTGAGAG   |
| MGRN1         | <a href="#">AB011116</a>  | TCACACATGCTGTCACGCATACACACACGCACATACTCCTGCACATGTTT    |

| Gene Symbol | Accession Number          | Sequence                                             |
|-------------|---------------------------|------------------------------------------------------|
| MGRN1       | <a href="#">XM_048119</a> | ATTTGTAAGTGGTACAAGATGAAGGACAGCAGCTTTCCATCCCTAGTTTCAG |
| MMRN        | <a href="#">NM_007351</a> | TTGAGAAACAGCCAGTGTTTTTCATTTATCTTTGCTTGCACATCTGCTCTG  |
| MSX2        | <a href="#">NM_002449</a> | TGAGAAATACTAGGTACATTCATCCTCACAGATTGCAAAGGTGATTTGGGTG |
| MT1X        | <a href="#">NM_005952</a> | GTGCAGCTGCTGTGCCTGATGCCAGGACAGCTGTGCTCTCAGATGTAAT    |
| MUC1        | <a href="#">NM_002456</a> | GGAGACGCAGTTCAATCAGTATAAAACGGAAGCAGCCTCTCGATATAAC    |
| MYBL2       | <a href="#">NM_002466</a> | ATCTTGTCTGAGGTGTTGAGGGTGTACGAGCCCATTCTCATGTTTACA     |
| MYC         | <a href="#">NM_002467</a> | CTTGGCTGAGTCTTGAGACTGAAAGATTTAGCCATAATGTAAACTGCCTC   |
| NAT1        | <a href="#">NM_000662</a> | GAAACAATCTTGTCTATTTGTCATCCAGCTCACCAGTTATCAACTGACGA   |
| NFIB        | <a href="#">NM_005596</a> | AGTTTGAACACAAAGGCTCTATGGAAGAAATGCCTCTATGTAGGTGAAGT   |
| NPEPPS      | <a href="#">NM_006310</a> | AGAAGTCAGTGGTAACTGCTGCAGGGCTTAATACATTAGTGGTAACTGGT   |
| NPY1R       | <a href="#">NM_000909</a> | TTCCGCTTACAATTTGTAGAAACACAAATATCGTTTTCCATACAGCAGTGCC |
| NQO1        | <a href="#">NM_000903</a> | CAGTCCCATGACCTTGGGGTACAATTGTAAACCTAGAGTTTTATCAACTT   |
| NRG1        | <a href="#">NM_013957</a> | ACTCAGAGAGTGAACAGAAGATGAAAGAGTAGGTGAAGATACGCCTTTC    |
| NSEP1       | <a href="#">NM_004559</a> | CCAGCAATAAGAAATGAACAAAAGATTGGAGCTGAAGACCTAAAGTGCTTG  |
| PCDH9       | <a href="#">NM_020403</a> | TTGCTGTTAACTGTTTGTATCATAGTTGGTCAATGCCTGGCAGGTACC     |
| PCOLCE2     | <a href="#">NM_013363</a> | AAGCCTTGGCCCTGAGGTGTTACAATCTTGTCTTGCCTTTTCTAAATCAAT  |
| PDGFA       | <a href="#">NM_002607</a> | ACCTGTTTTGTATACCTGAGAGCCTGCTATGTTCTTCTTTTGTGATCCA    |
| PDK3        | <a href="#">NM_005391</a> | AAGGACATCTGATATGTGCTGCAACATGGGTGAATCTTGAAGTCATTATG   |
| PGR         | <a href="#">NM_000926</a> | ATGTCTGAAGTTATTGCTGCACAATTACCCAAGATATTGGCAGGGATGGT   |
| PLAT        | <a href="#">NM_000930</a> | CCCTGGCTCTCAGAAGGTATTCCTTTTGTGTACAGTGTGTAAAGTGTA     |
| PLIN        | <a href="#">NM_002666</a> | GATATATAGACTTTATGTATAGCCACAGTTCATCCCAACCCTAGTCTTC    |
| PLK         | <a href="#">NM_005030</a> | TTGAATTCGGAAGTGTCTTTTCTTGGCTTTATGCACATTAACAGATGTG    |
| PLOD        | <a href="#">NM_000302</a> | ACCATTCACTTTTACTGCTTTGTAGTGACTCGTGCTCTCCAACCTGTCTT   |
| POLR2F      | <a href="#">NM_021974</a> | ATCTTCCCTGCCCTTGCCCCATGCCCAATTTTCACTTCTCACTTTATATGTG |
| POLYDOM     | <a href="#">NM_024500</a> | CCCAGTTTCTCAGCATTGTACATGGCAATAAGCTTGTTCTATCTGGATAC   |
| PON3        | <a href="#">NM_000940</a> | TCTGTGGCTTCTGTGTACCATGGGAAAATTCTCATAGGCACCGTATTTCA   |
| PPARBP      | <a href="#">NM_004774</a> | AGCTTATAGCTTGTGCTAATACTGTAGCATCAAGCCCAAGCAAATTAGTC   |
| PRAME       | <a href="#">NM_006115</a> | TCTGGCTTGGGAAGTACATGTAGGAGTTAATCCCTGTGTAGACTGTTGTA   |
| PRDX4       | <a href="#">NM_006406</a> | GACAAAGGAATCCTAAGACAAATTAATCTGAATGATCTTCTGTGGGTAG    |
| PRKACB      | <a href="#">NM_002731</a> | ATTATCGGTGCAGGTAGGTCAATTAACACCACTTCTTTTTCATCTGTACCAC |
| PTP4A2      | <a href="#">NM_003479</a> | GAAGTATTGCTAGCTGAAGCCAGTTTGACATAGAGAGATGTCAGATTGAT   |
| PTPRK       | <a href="#">NM_002844</a> | GTAATTGACTAAAGCATTCCAGTGTCTCTTTCTAGATTGCCAGCTCATG    |
| PTPRN2      | <a href="#">NM_002847</a> | CTACCCAGAAATAGGACAATTCATTCATTGACCAGGATGATCACATGG     |
| QDPR        | <a href="#">NM_000320</a> | TACAGCAGTCAGAGATGAGTATACTAGAATCATGGATTGCTGGAGGTCTT   |
| RAB31       | <a href="#">NM_006868</a> | ACTTTTCCGCCATGTATTCTATTCTGTAGTAAAGCATTCCATCAACAATGC  |
| RAB5EP      | <a href="#">NM_004703</a> | CTCTCAGCAGATTTTCAGGTGTAACCATTTGTTAACTGTAAGGTGTG      |
| RALGPS1A    | <a href="#">NM_014636</a> | TAAGGACTTTCTCTAATTCTTGTGAATCGTCTCACCCGCAGTAACCACTG   |
| RARRES3     | <a href="#">NM_004585</a> | CCCTCTCTCGCTGGCAAAGTATGATCTAATTGAAACAAGACTGAAGGATCA  |
| RERG        | <a href="#">NM_032918</a> | CTGAAAGTACAGTCTACAACCTGATAAAACCTTATGATTCTTTTCTCCCC   |
| RGS5        | <a href="#">NM_003617</a> | AATCTTTTAGCAACCCCAAGTATTCTTCACTATTTCCGCTTCTGCATTAG   |
| RNPC1       | <a href="#">NM_017495</a> | TGGGACAGAGTCAAGGCTCAGAGAATAAAGGTAGCTAATCTCATCATAAT   |
| S100A1      | <a href="#">NM_006271</a> | GCCTGTAACAATTTCTTCTGGGAGAACAGTTGAGCAGACAGCCACATTGG   |
| S100A11     | <a href="#">NM_005620</a> | TCCTAAGCTTCATGAATACAGAAGTCTGCTTCCACAAAGAACCAGA       |
| S100A8      | <a href="#">NM_002964</a> | GTTGGATATCAACACTGATGGTGCAGTTAACTTCCAGGAGTTCCTCATT    |
| SAA1        | <a href="#">NM_000331</a> | AGCCTACTCTGACATGAGAGAAGCCAATTACATCGGCTCAGACAAATACT   |
| SAA2        | <a href="#">NM_030754</a> | CAGGGATTCAAAGTTAGTGAGGTCTATGTCCAGAGAAGCTGAGATATG     |
| SCNN1A      | <a href="#">NM_001038</a> | TTGCTGTTGCACCATACTTTCTTGTACATTTGTGTCTCCCTTCCCAACTA   |

| Gene Symbol       | Accession Number          | Sequence                                              |
|-------------------|---------------------------|-------------------------------------------------------|
| SCUBE2 (CEGP1)    | <a href="#">NM_020974</a> | AGAGATGTTTCCAAGATCGTTCATCCGATTGCTACGTTCCAAAGTGTCCA    |
| SDC2              | <a href="#">NM_002998</a> | TTAAGCCTTTGAAGTGCCTCTGATTCTATGTAAC TTGTTGCAGACTGGTG   |
| SELENBP1          | <a href="#">NM_003944</a> | CATATACATTTACTGACCACTGTTGCTTGTGCTCACTGTGCTGCTTTTC     |
| SEMA3C            | <a href="#">NM_006379</a> | CAGAGTCACAGTTCCCTTTATTTACATAAGCCCAA ACTGATAGACAGTA    |
| SIAH2             | <a href="#">NM_005067</a> | CTGGTGTGAAAGACTAAATCAGTAGAGTTGGAAAAGCTTTATAACCGGTG    |
| SIAT4C            | <a href="#">NM_006278</a> | TACAACAAGAAGCAGACCACTTCACTACTATGAGCAGATCACGCTCAAGTC   |
| SLC40A1 (SLC11A3) | <a href="#">NM_014585</a> | AACCGTTTATATGCACTTTCATGGAGACTGCAATACGTTGCTATGAGCAC    |
| SLC5A6            | <a href="#">NM_021095</a> | CTCTGGGAATAGAAGATCCATTTGTCTTTGTGTAGAGCAAGCACGTTTTC    |
| SLC7A5            | <a href="#">NM_003486</a> | TAATGACGTGTGTGGCTGGGACCTTCTTTATTCTGTGTTAATGGCTAACC    |
| SLI               | <a href="#">AB001451</a>  | CCTCCCAGCTGTGACCCAGATGGGATGTTCCGGATCGGTTTGTAAATTA     |
| SLPI              | <a href="#">NM_003064</a> | GTTTCCCCTGTGAAAGCTTGATTCCCTGCCATATGGAGGAGGCTCTGGAGT   |
| SNCG              | <a href="#">NM_003087</a> | AGACCAAGGAGAATGTTGTACAGAGCGTGACCTCAGTGGCCGAGAAGACC    |
| SORBS1            | <a href="#">NM_015385</a> | TATGACGAAACAAGAAACAGAGATTTCCAATTGCTCTTTTGTCTTCAGAC    |
| SOX7              | <a href="#">NM_031439</a> | GATGCGCAGTCCAGAGCATGTATGAATAATCTCATAAAACAGTATCACAG    |
| SQLE              | <a href="#">NM_003129</a> | GCCCTTCTCAGTAGTAGTGCTGTATTGTACAAAGCGTGTCTGTAAATATT    |
| STARD3            | <a href="#">NM_006804</a> | TAGGATTATTGAAAGAGTCTGGGACCCTTGTGGGGAGTGGGTGGCAGGT     |
| STAT6             | <a href="#">NM_003153</a> | ACACCCAAAGAGTAAGGCAGATTAGAGACCAGAAAGACCTTGACTACTTC    |
| STK38             | <a href="#">NM_007271</a> | GTGTGTTTTGCAAGAATGTGTGGTAAGCCTGGGTAAAGAGAAGGAACT      |
| STK6              | <a href="#">NM_003600</a> | ATAGGAACACGTGCTCTACCTCCATTTAGGGATTTGCTTGGGATACAGAA    |
| TCEA3             | <a href="#">XM_114075</a> | AATATTTCTTCCCTACTCTTTCCTCATCTCTTCCCAA ACTCTCTGCTATTCT |
| TCEAL1            | <a href="#">NM_004780</a> | AATCTACAAGTTTCCCTCTTTCAGTCATGAGCCCTACACATTTGCATGAA    |
| TFF3              | <a href="#">NM_003226</a> | TCTGCTGAAAGTTCATATCTGGAGCCTGATGTCTTAACGAATAAAGGTCC    |
| TFRC              | <a href="#">NM_003234</a> | CCTGAATGAAATATCAGACTAGTGACAAGCTCCTGGTCTTGAGATGTCTT    |
| TGFB2             | <a href="#">NM_003238</a> | GAAGGCCTTATTCTACATTTACCTACTTTGTAAGTGAGAGAGACAAGAAG    |
| TLE3              | <a href="#">AB046767</a>  | ACTTTTTGGTACCAACATGTTCTGAGGTGTTAGGATTTGGGTTGGGTT      |
| TLE3              | <a href="#">NM_005078</a> | GACATTTTCAGCGGATGACAAATACATTGTAACAGGCTCTGGTGACAAGAA   |
| TMSB10            | <a href="#">NM_021103</a> | CGAGACTGCACGGATTGTTTTAAGAAAATGGCAGACAAACCAGACATG      |
| TNF               | <a href="#">NM_000594</a> | GTTGTGTCTGTAATCGCCCTACTATTTCAGTGGCGAGAAATAAAGTTTGCT   |
| TNNI2             | <a href="#">NM_003282</a> | TGAAGAGGAGAAGTACGACATGGAGGTGAGGGTGCAGAAGACCAGCAAGG    |
| TOP2A             | <a href="#">NM_001067</a> | TCTGGCTGCCTCTGAGTCTGAATCTCCCAAAGAGAGAAACCAATTTCTAA    |
| TP53BP2           | <a href="#">NM_005426</a> | TTATTGGGCAGTTGGGAAATCAGCTCTCTGTCTGTTGAGTGTTTTCA       |
| TRAP100           | <a href="#">NM_014815</a> | GTGTGTGTGTGTGTGTTTGTGTGATTTTGTAAATATGTGAGGGAAATCTACC  |
| TRIM29            | <a href="#">NM_012101</a> | ATTCCCTTAACATGATATAATCCACCCATGCAATAGCTACTGGCCAG       |
| UBE2C             | <a href="#">NM_007019</a> | GGCGATAAAGGGATTTCTGCCTTCCCTGAATCAGACAACCTTTTCAAATG    |
| VAV3              | <a href="#">NM_006113</a> | GACAGAAGTAAATGTTTTCCATATACTTTGTCTTGCCTGTATGCAGCCCT    |
| VGLL1             | <a href="#">NM_016267</a> | GCTCAGTTCACTATAAGAACTATATGTATCTCGTGGATCTGCCAGTACC     |
| VWF               | <a href="#">NM_000552</a> | TCAATGAGTGTGTCCGAGTGAAGGAGGAGGTCTTTATAACAACAAAGGAA    |
| WWP1              | <a href="#">NM_007013</a> | TGCTGCTGGCTTTTCTGAAGACAGGTGCTTGAACCTTGTGAGTTTGTTTTA   |
| XBP1              | <a href="#">NM_005080</a> | CCAGGTATTGTCTTTTGCATCCAGCAGTCCAAGGTATTGAGACATATTA     |
| YWHAZ             | <a href="#">NM_003406</a> | TTGATGATGGGAGGCAGTGAGTCTTGATGATAAGGGTGAGAACTGAAAT     |
