# Supplementary material for: Evaluation of MetriGenix custom 4D™ arrays applied for detection of breast cancer subtypes
Source: PubMed Central journal article supplement (PMC1421426; doi:10.1186/1471-2407-6-59), 2006-03-15
Supplement: 1471-2407-6-59-S2.pdf [file 1471-2407-6-59-S2.pdf]

## Supplementary table 2

### ANOVA Analysis Data Table

| Gene symbol    | P-Value     |
|----------------|-------------|
| FOXA1          | 4,41E-11    |
| ID4            | 5,95E-06    |
| TFF3           | 1,07E-05    |
| SCUBE2 (CEGP1) | 6,81E-05    |
| CX3CR1         | 9,69E-05    |
| XBP1           | 1,93E-04    |
| CRYAB          | 4,07E-04    |
| DP1            | 4,54E-04    |
| GATA3          | 5,67E-04    |
| CHI3L2         | 6,24E-04    |
| LOC255743      | 6,54E-04    |
| FBP1           | 7,41E-04    |
| CaMKIINalpha   | 7,66E-04    |
| FLJ10697       | 8,52E-04    |
| GPCR1          | 9,06E-04    |
| FLJ10948       | 0,00105434  |
| GABRP          | 0,001071564 |
| COX6C          | 0,001761707 |
| ACTG2          | 0,001805912 |
| SLPI           | 0,001839808 |
| PLK            | 0,001935442 |
| PLAT           | 0,001975225 |
| ERBB2          | 0,001997855 |
| ESR1           | 0,002163017 |
| ASAH1          | 0,002745665 |
| CYB5           | 0,002807281 |
| LIV-1          | 0,003135506 |
| CYB561         | 0,004314936 |
| EST            | 0,004765361 |
| CES1           | 0,004804262 |
| MUC1           | 0,004851949 |
| RNPC1          | 0,004857131 |
| KRT17          | 0,00508879  |
| ANXA8          | 0,005102396 |
| ANP32E         | 0,005155266 |
| CCNA2          | 0,00534309  |
| TCEAL1         | 0,006267944 |
| MYBL2          | 0,007314601 |
| WWP1           | 0,007777517 |
| KIT            | 0,008176204 |
| B3GNT5         | 0,008452305 |
| TCEA3          | 0,009272519 |
| MGC27171       | 0,009973489 |
| IGFBP2         | 0,010569537 |

|               |             |
|---------------|-------------|
| CCR6          | 0,012449224 |
| STK6          | 0,014079383 |
| UBE2C         | 0,014234206 |
| GRB7          | 0,014462295 |
| CBR1          | 0,014697295 |
| SEMA3C        | 0,015475335 |
| PPARBP        | 0,01585065  |
| MSX2          | 0,01759012  |
| Gene symbol   | P-Value     |
| QDPR          | 0,01879313  |
| CCR5          | 0,018977553 |
| SCNN1A        | 0,019538218 |
| FLJ10980      | 0,020524453 |
| HSD17B4       | 0,020749208 |
| MYC           | 0,025674744 |
| ESR2          | 0,0259844   |
| HOXB5         | 0,027198812 |
| KIF23 (KNSL5) | 0,02730503  |
| NAT1          | 0,02804106  |
| CTPS          | 0,03242716  |
| ANXA9         | 0,032539207 |
| TRIM29        | 0,033407852 |
| FACL2         | 0,034127403 |
| SOX7          | 0,03502203  |
| S100A8        | 0,035610106 |
| RAB5EP        | 0,037102733 |
| SLC7A5        | 0,037463706 |
| CHIT1         | 0,03846853  |
| ACADSB        | 0,038726125 |
| GALNT10       | 0,03959366  |
| LAPTM4B       | 0,04151741  |
| CXCR4         | 0,047612768 |
| MFGE8         | 0,048557464 |
| F3            | 0,048741534 |
| KIAA0303      | 0,048814416 |
| GNG11         | 0,0490031   |
| CEACAM6       | 0,052084636 |
| TOP2A         | 0,054399602 |
| CDC20         | 0,055266708 |
| VAV3          | 0,05532296  |
| PGR           | 0,06270949  |
| KRT5          | 0,06407526  |
| CRABP1        | 0,065156005 |
| RERG          | 0,06880306  |
| FLJ25604      | 0,07037382  |
| CX3CL1        | 0,070794106 |
| APM2          | 0,07080154  |
| S100A1        | 0,07158841  |

|             |             |
|-------------|-------------|
| HMGCS2      | 0,073329605 |
| ATP6V1G1    | 0,078542344 |
| HRASLS3     | 0,08358025  |
| FZD7        | 0,08513731  |
| LU          | 0,08886235  |
| BTG3        | 0,09270386  |
| PTPRK       | 0,09331719  |
| ENPP2       | 0,09390421  |
| CDH3        | 0,10014556  |
| FMO2        | 0,10053912  |
| FLT1        | 0,1034666   |
| BLVRA       | 0,10629862  |
| POLR2F      | 0,10639702  |
| RAB31       | 0,10755934  |
| NQO1        | 0,108961985 |
| LPL         | 0,1123477   |
| Gene symbol | P-Value     |
| FMO5        | 0,11254138  |
| CDK2AP1     | 0,11868259  |
| TP53BP2     | 0,119296975 |
| C4A         | 0,11983251  |
| LAD1        | 0,12141835  |
| PLOD        | 0,121677615 |
| ACOX2       | 0,122658156 |
| STAT6       | 0,12464152  |
| NFIB        | 0,1341539   |
| BF          | 0,1375532   |
| MAP3K8      | 0,1420296   |
| PON3        | 0,14249964  |
| MDS029      | 0,14414787  |
| CCNE1       | 0,14526032  |
| FXYD3       | 0,14853236  |
| STARD3      | 0,15595339  |
| BMP4        | 0,15693694  |
| AGTR1       | 0,16030659  |
| RARRES3     | 0,16113847  |
| SIAT4C      | 0,16651137  |
| SAA1        | 0,16762336  |
| ENPP5       | 0,16963522  |
| FLJ10511    | 0,17049482  |
| CDC14A      | 0,17182158  |
| MCM3        | 0,17348142  |
| CSDA        | 0,17851794  |
| VWF         | 0,18030086  |
| FTHFD       | 0,18781449  |
| ATRCA       | 0,1949262   |
| BECN1       | 0,19503096  |
| TRAP100     | 0,19536301  |

|                   |            |
|-------------------|------------|
| VGLL1             | 0,20647576 |
| PTP4A2            | 0,21010712 |
| C10orf7           | 0,21072227 |
| GLDC              | 0,2152065  |
| AOC3              | 0,21846202 |
| RGS5              | 0,22463913 |
| APEG1             | 0,22572647 |
| MCCC2             | 0,2268849  |
| IL8RB             | 0,22729664 |
| LOC157378         | 0,22808915 |
| MT1X              | 0,22874051 |
| KIAA0876          | 0,23098443 |
| LRBA              | 0,23321378 |
| GSTP1             | 0,25187021 |
| PRDX4             | 0,2564596  |
| FABP7             | 0,26275727 |
| INPP4B            | 0,27627674 |
| STK38             | 0,28111094 |
| SELENBP1          | 0,28833914 |
| ITGA7             | 0,28992188 |
| ATP1A2            | 0,2900379  |
| LAMC2             | 0,2912473  |
| ITM2C             | 0,2914199  |
| ANXA1             | 0,29300204 |
| Gene symbol       | P-Value    |
| GPX3              | 0,302118   |
| Spacer            | 0,30415493 |
| NPEPPS            | 0,30814484 |
| CAV1              | 0,31017128 |
| SLC40A1 (SLC11A3) | 0,3126513  |
| RALGPS1A          | 0,3131376  |
| SDC2              | 0,3165861  |
| PRKACB            | 0,31716362 |
| ADRM1             | 0,3184579  |
| GPD1              | 0,3264424  |
| GGH               | 0,33405292 |
| PRAME             | 0,33405983 |
| CD36              | 0,34491867 |
| ALCAM             | 0,34546727 |
| CDH1              | 0,34671843 |
| KIP2              | 0,35152355 |
| FLJ13322          | 0,35677743 |
| SORBS1            | 0,36085764 |
| MGRN1             | 0,36649603 |
| SIAH2             | 0,37878618 |
| TLE3              | 0,37895098 |
| CRAT              | 0,3802302  |
| HOXB6             | 0,38182795 |

|              |            |
|--------------|------------|
| KCNK1        | 0,38326746 |
| TGFB2        | 0,38903442 |
| E2F1         | 0,39507544 |
| EPAC         | 0,40071565 |
| AKR1C3       | 0,40189198 |
| NSEP1        | 0,40922096 |
| HSPC163      | 0,4128603  |
| EDN1         | 0,41534907 |
| CDC14B       | 0,41694227 |
| TNF          | 0,42563495 |
| NRG1         | 0,43956098 |
| FMOD         | 0,4509794  |
| FLJ14525     | 0,45127353 |
| IGJ          | 0,45728353 |
| PDGFA        | 0,4660699  |
| POLYDOM      | 0,4686419  |
| DIP13B       | 0,47639865 |
| FADS2        | 0,48020712 |
| CCND1        | 0,49852106 |
| EIIs1        | 0,5031813  |
| TNNI2        | 0,51737607 |
| DKFZP761F241 | 0,52240413 |
| TMSB10       | 0,532218   |
| MMRN         | 0,5339166  |
| SLI          | 0,5401665  |
| CP           | 0,54324913 |
| CCR7         | 0,54753166 |
| PCDH9        | 0,55094385 |
| PDK3         | 0,5623653  |
| PTPRN2       | 0,5718477  |
| CCR8         | 0,60700023 |
| ARPC5        | 0,6098889  |
| Gene symbol  | P-Value    |
| EBF          | 0,6123428  |
| BPHL         | 0,63477945 |
| TFRC         | 0,64363045 |
| ALDH1A2      | 0,6546733  |
| YWHAZ        | 0,66355926 |
| FABP4        | 0,6673679  |
| CXCL1        | 0,6748335  |
| ADRA2A       | 0,6757176  |
| CD24         | 0,6846844  |
| PLIN         | 0,7080254  |
| HIS1         | 0,7113714  |
| FVT1         | 0,72638685 |
| SLC5A6       | 0,7324925  |
| LOC283445    | 0,74718785 |
| SNCG         | 0,7610084  |

|           |            |
|-----------|------------|
| F2        | 0,763065   |
| IMP-1     | 0,76504534 |
| FLJ32389  | 0,7697702  |
| PCOLCE2   | 0,7721332  |
| MGC10500  | 0,7754117  |
| CYP2A6    | 0,77591175 |
| APOD      | 0,78278327 |
| EBNA1BP2  | 0,7836556  |
| GSTM3     | 0,7875397  |
| KIAA1691  | 0,78918236 |
| Thr       | 0,8009849  |
| KIAA0182  | 0,80341583 |
| CAPN6     | 0,8108703  |
| KIAA0239  | 0,82694614 |
| NPY1R     | 0,8286034  |
| S100A11   | 0,8518521  |
| BCL2      | 0,85512596 |
| KIAA1025  | 0,87081397 |
| C14orf132 | 0,87540907 |
| GRLF1     | 0,8977547  |
| SQLE      | 0,9155909  |
| CACNA2D2  | 0,9450517  |
| CRBPIV    | 0,94613254 |
| CCNE2     | 0,9477784  |
| LAF4      | 0,9525647  |
| LOC284665 | 0,98907566 |
