# Supplementary material for: Evaluation of MetriGenix custom 4D™ arrays applied for detection of breast cancer subtypes
Source: PubMed Central journal article supplement (PMC1421426; doi:10.1186/1471-2407-6-59), 2006-03-15

Supplementary figure S1  
226 "intrinsic" gene cluster diagram

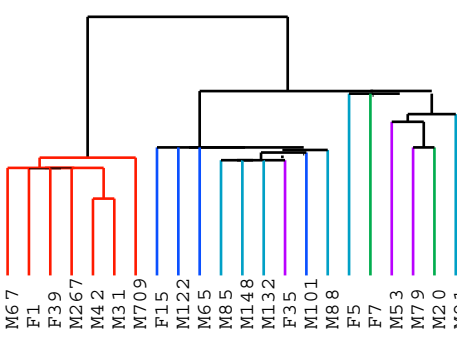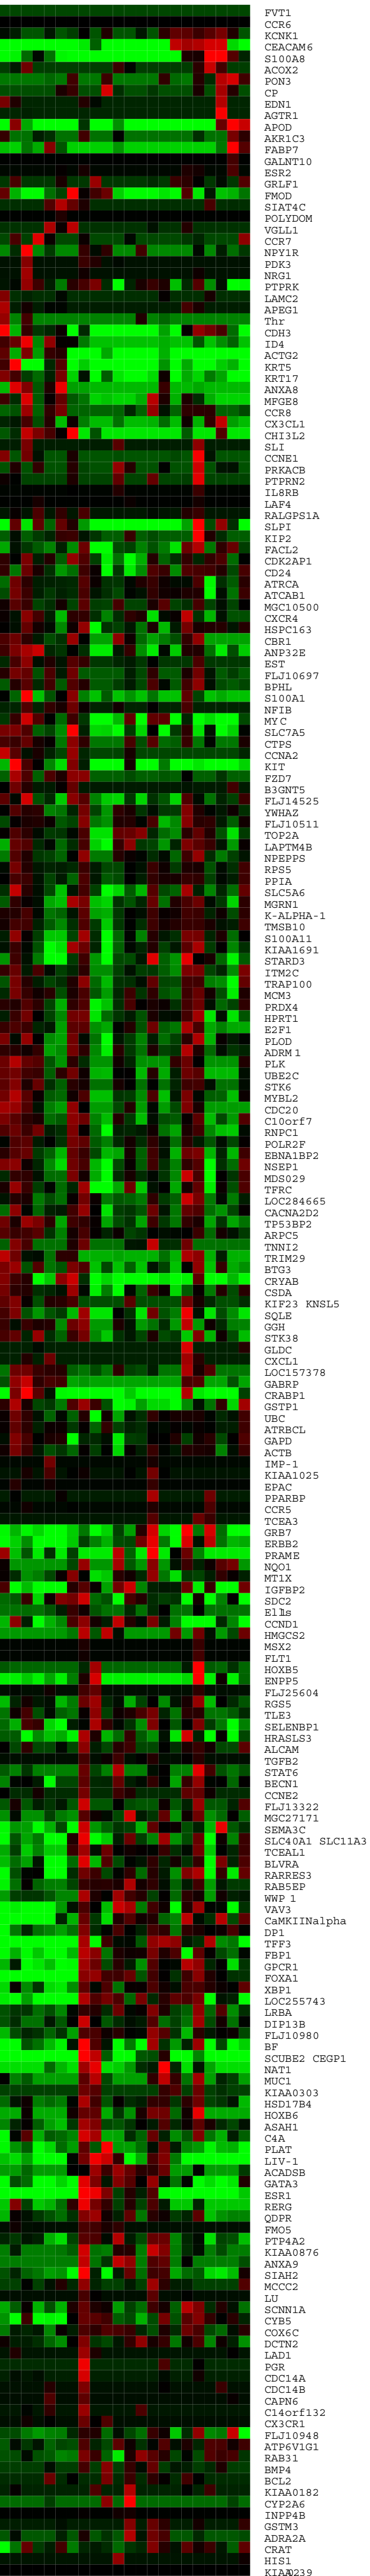

Supplement: 1471-2407-6-59-S3.pdf [file 1471-2407-6-59-S3.pdf]
