# Supplementary material for: Evaluation of MetriGenix custom 4D™ arrays applied for detection of breast cancer subtypes
Source: PubMed Central journal article supplement (PMC1421426; doi:10.1186/1471-2407-6-59), 2006-03-15
Supplement: 1471-2407-6-59-S4.pdf [file 1471-2407-6-59-S4.pdf]

## Supplementary table 3

### PAM output genes

| <b>PAM-results</b> |                          |                              |
|--------------------|--------------------------|------------------------------|
| <b>Gene Symbol</b> | <b>1 score (luminal)</b> | <b>2 score (non-luminal)</b> |
| SLPI               | -0,2973                  | 0,2478                       |
| GATA3              | 0,2374                   | -0,1978                      |
| FLJ1697            | -0,1801                  | 0,1501                       |
| ESR1               | 0,176                    | -0,1466                      |
| LOC255743          | 0,1638                   | -0,1365                      |
| CRYAB              | -0,1408                  | 0,1173                       |
| IGFBP2             | 0,1144                   | -0,0953                      |
| LIV-1              | 0,0923                   | -0,0769                      |
| CHI3L2             | -0,0905                  | 0,0754                       |
| ATRCA              | 0,0836                   | -0,0697                      |
| CDH3               | -0,0789                  | 0,0657                       |
| CDK2AP1            | -0,0767                  | 0,0639                       |
| TFF3               | 0,0735                   | -0,0612                      |
| SAA1               | -0,0603                  | 0,0503                       |
| FOXA1              | 0,0511                   | -0,0426                      |
| TCEAL1             | 0,0422                   | -0,0352                      |
| S1A8               | -0,0416                  | 0,0347                       |
| MFGE8              | -0,0395                  | 0,0329                       |
| HRASLS3            | 0,0372                   | -0,031                       |
| ID4                | -0,0365                  | 0,0304                       |
| ACADSB             | 0,0364                   | -0,0303                      |
| NAT1               | 0,0321                   | -0,0268                      |
| GABRP              | -0,0314                  | 0,0261                       |
| FBP1               | 0,0121                   | -0,0101                      |
| TRIM29             | -0,0084                  | 0,007                        |
| CX3CL1             | -0,0076                  | 0,0063                       |
| KRT5               | -0,0039                  | 0,0032                       |
